# Supplementary material for: Flaxseed oil supplementation improves intestinal function and immunity, associated with altered intestinal microbiome and fatty acid profile in pigs with intrauterine growth retardation
Source: Royal Society of Chemistry journal article supplement (doi:10.1039/c9fo01877h), 2019-01-01
Supplement: c9fo01877h1.pdf [file c9fo01877h1.pdf]

**Supplementary Table 1** Effects of dietary oil sources on raw reads, sequences and OTUs of intra-uterine growth retarded weanling pigs

|                        | NBW        |            | IUGR       |            | BW    | Diet  | BW×Diet |
|------------------------|------------|------------|------------|------------|-------|-------|---------|
|                        | SO         | FO         | SO         | FO         |       |       |         |
| Raw reads              | 69140±3065 | 65388±4498 | 64066±2722 | 66597±4657 | 0.618 | 0.875 | 0.419   |
| High quality sequences | 64227±2524 | 60419±4193 | 59996±2752 | 62762±4143 | 0.789 | 0.882 | 0.354   |
| OTUs                   | 581±18     | 596±24     | 601±12     | 566±37     | 0.846 | 0.708 | 0.317   |

Mean values with their standard error, n = 8 in each group

NBW, normal birth weight; IUGR, intrauterine growth retarded; SO, soybean oil; FO, flaxseed oil.

**Supplementary Table 2** The relative abundances of nine phyla (% , > 1% in at least one sample) and Firmicutes/Bacteroidetes ratio

|                                  | NBW        |            | IUGR       |            | BW    | Diet  | BW×Diet |
|----------------------------------|------------|------------|------------|------------|-------|-------|---------|
|                                  | SO         | FO         | SO         | FO         |       |       |         |
| <i>Firmicutes</i>                | 73.84±4.83 | 73.50±3.27 | 76.79±1.66 | 80.22±2.05 | 0.115 | 0.605 | 0.667   |
| <i>Bacteroidetes</i>             | 17.94±3.38 | 20.19±2.27 | 16.84±1.49 | 14.49±2.06 | 0.233 | 0.907 | 0.189   |
| <i>Proteobacteria</i>            | 1.56±0.40  | 2.56±1.30  | 0.67±0.19  | 0.76±0.22  | 0.037 | 0.927 | 0.800   |
| <i>Euryarchaeota</i>             | 2.14±1.26  | 1.24±0.29  | 1.47±0.40  | 0.54±0.14  | 0.751 | 0.941 | 0.900   |
| <i>Actinobacteria</i>            | 0.54±0.30  | 1.21±0.48  | 0.20±0.04  | 2.23±0.93  | 0.943 | 0.017 | 0.239   |
| <i>Spirochaetes</i>              | 0.77±0.31  | 0.55±0.19  | 1.97±0.64  | 0.73±0.49  | 0.393 | 0.040 | 0.151   |
| <i>Tenericutes</i>               | 0.30±0.08  | 0.35±0.05  | 0.52±0.26  | 0.36±0.11  | 0.791 | 0.905 | 0.417   |
| <i>Melainabacteria</i>           | 0.05±0.01  | 0.10±0.02  | 0.05±0.01  | 0.09±0.02  | 0.549 | 0.017 | 0.155   |
| <i>Unidentified Bacteria</i>     | 0.13±0.03  | 0.08±0.03  | 0.90±0.63  | 0.11±0.05  | 0.238 | 0.210 | 0.268   |
| <i>Others</i>                    | 0.31±0.13  | 0.20±0.13  | 0.49±0.20  | 0.46±0.29  | 0.365 | 0.159 | 0.913   |
| <i>Firmicutes/ Bacteroidetes</i> | 5.42±1.17  | 4.13±0.65  | 4.92±0.62  | 5.29±0.61  | 0.685 | 0.577 | 0.321   |

Mean values with their standard error, n = 8 in each group

NBW, normal birth weight; IUGR, intrauterine growth retarded; SO, soybean oil; FO, flaxseed oil.

Mean values within a row with different superscript letters were significantly different ( $P < 0.05$ )

**Supplementary Table 3** The relative abundances of 23 genera (% , > 1% in at least one sample) in the colonic digesta of weanling pigs

|                              | NBW         |             | IUGR       |            | BW    | Diet  | BW×Diet |
|------------------------------|-------------|-------------|------------|------------|-------|-------|---------|
|                              | SO          | FO          | SO         | FO         |       |       |         |
| <i>Lactobacillus</i>         | 25.15±5.63  | 13.24±2.70  | 20.97±4.61 | 25.27±6.38 | 0.607 | 0.341 | 0.301   |
| <i>Campylobacter</i>         | 0.06±0.02   | 0.06±0.03   | 0.86±0.60  | 0.09±0.05  | 0.336 | 0.598 | 0.361   |
| <i>Agathobacter</i>          | 4.96±1.81   | 3.52±0.82   | 2.88±0.57  | 5.06±1.89  | 0.662 | 0.702 | 0.325   |
| <i>Streptococcus</i>         | 2.49±1.59   | 3.90±1.74   | 2.21±1.32  | 2.87±1.19  | 0.785 | 0.361 | 0.921   |
| <i>Terrisporobacter</i>      | 1.32±0.48   | 4.07±1.64   | 1.93±1.28  | 0.98±0.39  | 0.147 | 0.585 | 0.421   |
| <i>Methanobrevibacter</i>    | 2.11±1.24   | 1.16±0.27   | 1.44±0.41  | 0.52±0.14  | 0.752 | 0.975 | 0.936   |
| <i>Selenomonas</i>           | 2.08±1.13   | 2.42±1.09   | 0.84±0.38  | 1.42±0.55  | 0.374 | 0.210 | 0.714   |
| <i>Megasphaera</i>           | 1.37±0.46   | 1.78±1.05   | 1.50±0.93  | 0.77±0.20  | 0.659 | 0.819 | 0.987   |
| <i>Roseburia</i>             | 2.24±0.66   | 2.81±0.88   | 2.14±0.68  | 1.89±0.47  | 0.326 | 0.590 | 0.582   |
| <i>Faecalibacterium</i>      | 1.90±0.48   | 2.56±0.64   | 2.28±0.47  | 3.70±0.86  | 0.303 | 0.147 | 0.777   |
| <i>Sarcina</i>               | 0.18±0.09   | 0.48±0.34   | 1.22±0.88  | 0.03±0.02  | 0.723 | 0.803 | 0.908   |
| <i>Blautia</i>               | 2.34±0.68ab | 2.90±0.58ab | 1.72±0.36b | 3.46±0.41a | 0.924 | 0.008 | 0.254   |
| <i>Bifidobacterium</i>       | 0.39±0.30ab | 1.01±0.47ab | 0.05±0.02b | 1.92±0.94a | 0.744 | 0.047 | 0.469   |
| <i>Alloprevotella</i>        | 1.35±0.56   | 1.02±0.36   | 0.99±0.35  | 0.51±0.15  | 0.293 | 0.239 | 0.638   |
| <i>Anaerovibrio</i>          | 1.13±0.54   | 0.78±0.19   | 1.16±0.17  | 0.67±0.22  | 0.718 | 0.173 | 0.177   |
| <i>Dialister</i>             | 0.20±0.17   | 0.24±0.11   | 0.07±0.05  | 0.88±0.44  | 0.519 | 0.293 | 0.988   |
| <i>Butyricoccus</i>          | 1.20±0.22   | 0.85±0.18   | 1.32±0.28  | 1.28±0.31  | 0.262 | 0.483 | 0.518   |
| <i>Succinivibrio</i>         | 0.48±0.34   | 0.17±0.06   | 0.02±0.01  | 0.27±0.13  | 0.481 | 0.245 | 0.740   |
| <i>Subdoligranulum</i>       | 1.36±0.28   | 1.23±0.27   | 1.19±0.25  | 1.66±0.21  | 0.702 | 0.426 | 0.179   |
| <i>Parabacteroides</i>       | 0.39±0.16   | 0.43±0.13   | 0.61±0.25  | 0.16±0.05  | 0.429 | 0.114 | 0.017   |
| <i>Oscillospira</i>          | 0.16±0.03   | 0.42±0.16   | 0.31±0.09  | 0.27±0.07  | 0.733 | 0.374 | 0.093   |
| <i>Desulfovibrio</i>         | 0.36±0.07   | 0.28±0.08   | 0.32±0.08  | 0.33±0.16  | 0.361 | 0.312 | 0.859   |
| <i>Phascolarctobacterium</i> | 0.33±0.06b  | 0.54±0.09ab | 0.64±0.06a | 0.61±0.12a | 0.022 | 0.324 | 0.102   |
| <i>Others</i>                | 33.13±4.40  | 40.07±3.62  | 42.73±3.30 | 34.03±5.06 | 0.845 | 0.734 | 0.056   |

Mean values with their standard error, n = 8 in each group

NBW, normal birth weight; IUGR, intrauterine growth retarded; SO, soybean oil; FO, flaxseed oil.

Mean values within a row with different superscript letters were significantly different ( $P < 0.05$ )

**Supplementary Table 4** Effects of different oil sources on concentrations of short chain fatty acids in colonic digesta of intra-uterine growth retarded weanling pigs

|                       | NBW       |           | IUGR      |           | BW    | Diet  | BW×Diet |
|-----------------------|-----------|-----------|-----------|-----------|-------|-------|---------|
|                       | SO        | FO        | SO        | FO        |       |       |         |
| Acetate, mg/g         | 3.62±0.16 | 3.73±0.20 | 3.61±0.13 | 3.98±0.18 | 0.464 | 0.169 | 0.460   |
| Propanoic acid, mg/g  | 2.47±0.26 | 2.33±0.14 | 2.15±0.14 | 2.56±0.15 | 0.797 | 0.460 | 0.139   |
| Isobutyric acid, mg/g | 0.15±0.02 | 0.19±0.03 | 0.18±0.02 | 0.20±0.02 | 0.245 | 0.190 | 0.554   |
| Butyrate, mg/g        | 1.79±0.18 | 2.02±0.14 | 1.63±0.20 | 1.75±0.18 | 0.243 | 0.322 | 0.750   |
| Isovaleric acid, mg/g | 0.18±0.02 | 0.23±0.04 | 0.21±0.02 | 0.23±0.03 | 0.530 | 0.239 | 0.649   |
| Valeric acid, mg/g    | 0.55±0.08 | 0.46±0.04 | 0.40±0.08 | 0.51±0.06 | 0.456 | 0.798 | 0.127   |

Mean values with their standard error, n = 8 in each group

NBW, normal birth weight; IUGR, intrauterine growth retarded; SO, soybean oil; FO flaxseed oil.

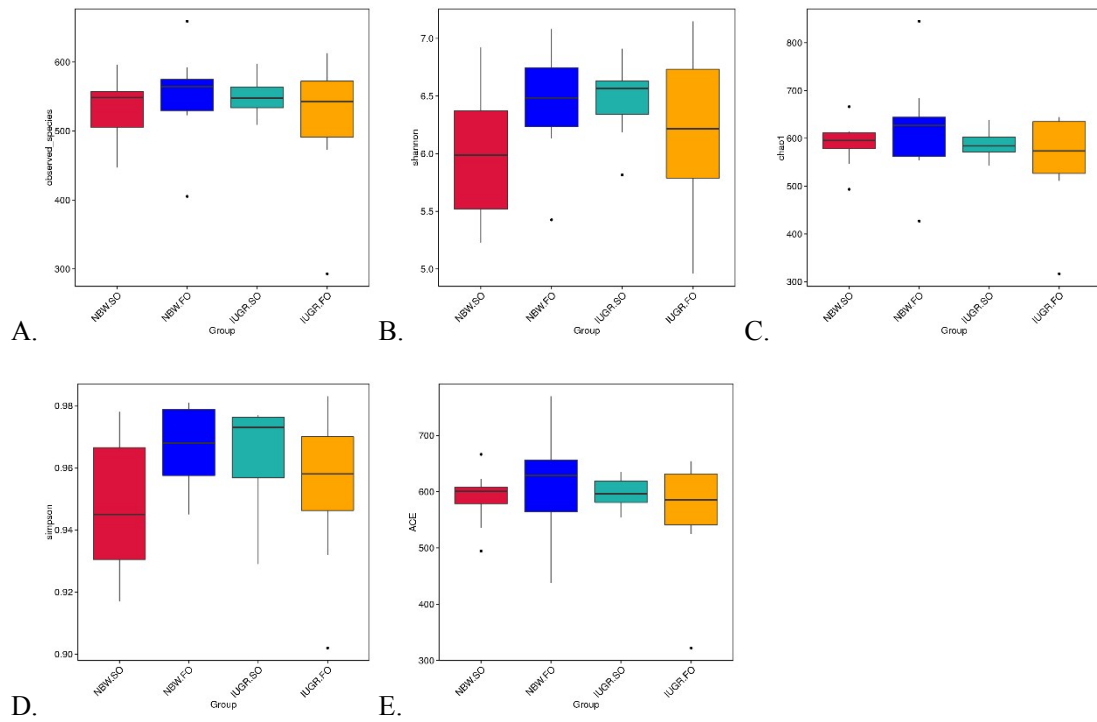

**Supplementary Figure 1** Differences on bacterial community diversity and richness among the four treatments. (A) Observed OTUs; (B) Shannon index; (C) Chao1 index; (D) Simpson index; (E) ACE. NBW, normal birth weight; IUGR, intrauterine growth retarded; SO, soybean oil; FO flaxseed oil.
